# Supplementary material
Source: PubMed Central journal article supplement (PMC7098846)
Supplement: NIHMS1574628-supplement-Supplementary_Material.pdf [file NIHMS1574628-supplement-Supplementary_Material.pdf]

SUPPORTING INFORMATION FOR:

# Nanoparticle-Mediated Co-Delivery of Notch-1 Antibodies and ABT-737 as a Potent Treatment Strategy for Triple-Negative Breast Cancer

Danielle M. Valcourt<sup>1</sup>, Megan N. Dang<sup>1</sup>, Mackenzie A. Scully<sup>1</sup>, and Emily S. Day<sup>1,2,3\*</sup>

<sup>1</sup>Department of Biomedical Engineering, University of Delaware, 161 Colburn Lab,  
Newark, DE 19716, United States

<sup>2</sup>Department of Materials Science & Engineering, University of Delaware, 201 DuPont  
Hall, Newark, DE 19716, United States

<sup>3</sup>Helen F. Graham Cancer Center & Research Institute, 4701 Ogletown Stanton Road,  
Newark, DE 19713, United States

*\*Corresponding author:*

Emily S. Day ([emilyday@udel.edu](mailto:emilyday@udel.edu))

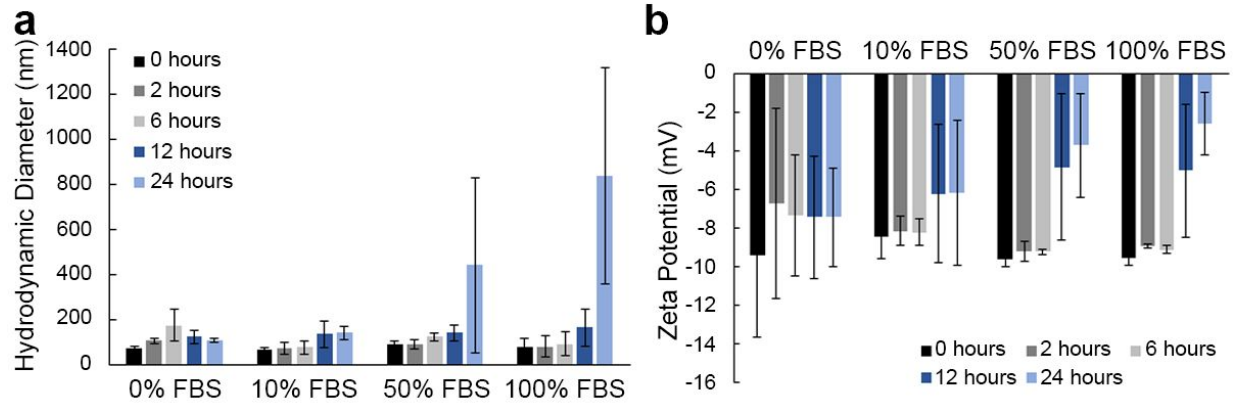

**Figure S1:** Serum stability of N1-ABT-NPs. (a) Hydrodynamic diameter and (b) zeta potential of N1-ABT-NPs in 0%, 10%, 50%, and 100% fetal bovine serum (FBS) over 24 hours.

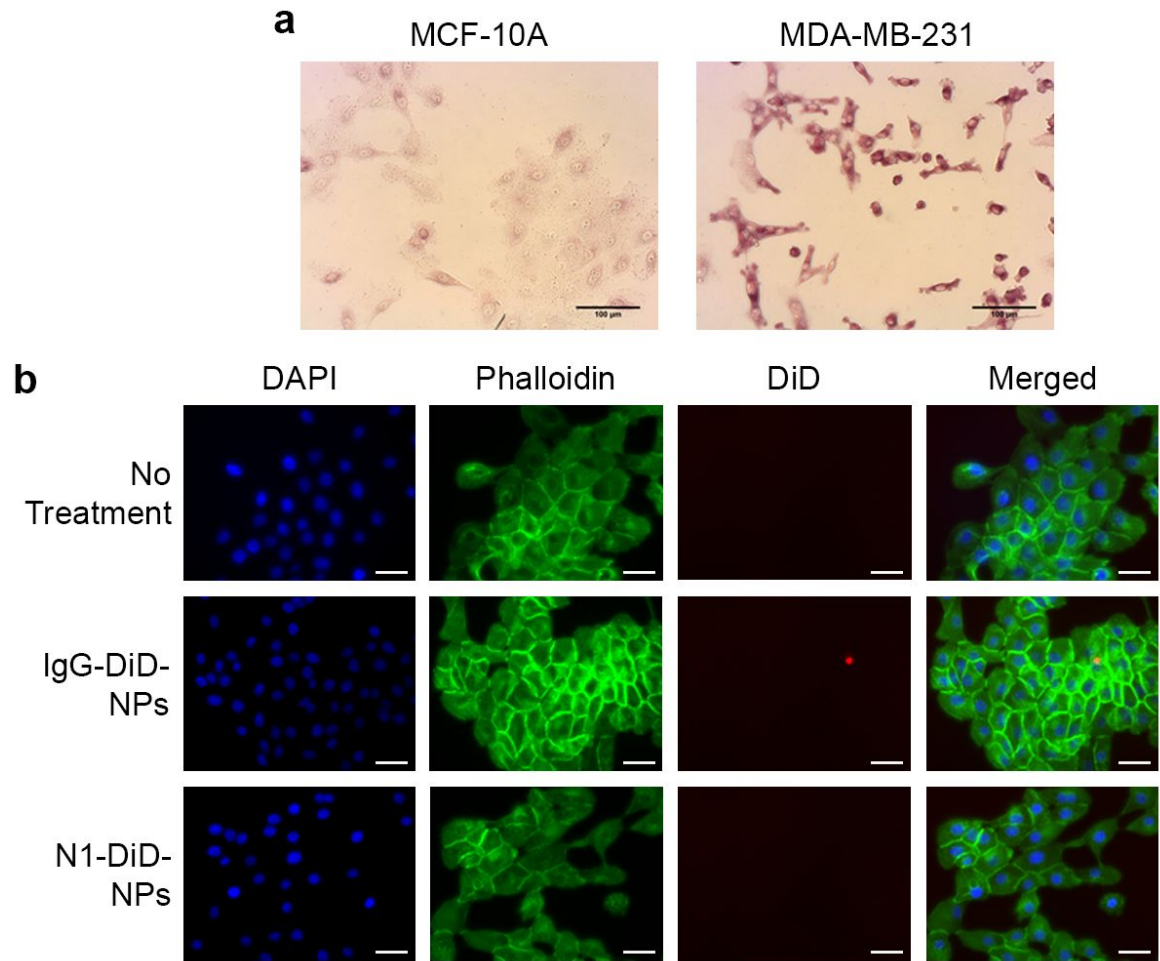

**Figure S2:** Notch-1 receptor expression in MDA-MB-231 TNBC cells versus non-cancerous MCF-10A cells and examination of NP binding to MCF-10A cells. (a) Immunocytochemistry staining for the Notch-1 receptor (dark red signal) in MCF-10A healthy mammary cells and MDA-MB-231 TNBC cells. Scale bars = 100  $\mu\text{m}$ . (b) Fluorescence microscopy images showing DiD-loaded NP interaction with MCF-10A cells. Nuclei are blue (DAPI), actin is green (Phalloidin), and DiD cargo is red. Scale bars = 50  $\mu\text{m}$ .

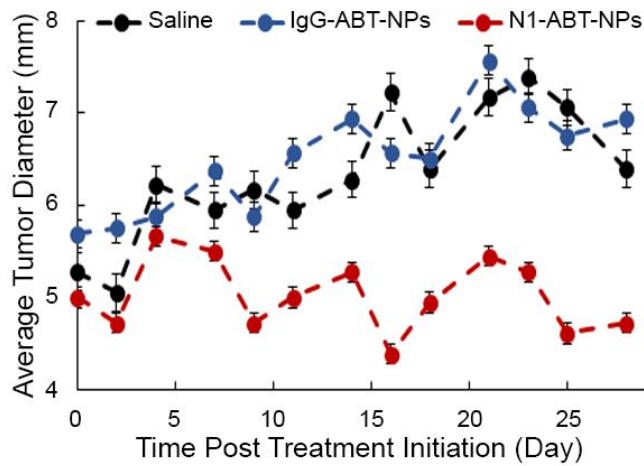

**Figure S3:** Average tumor diameter for mice bearing subcutaneous MDA-MB-231 TNBC tumors that were treated intravenously with saline, IgG-ABT-NPs, or N1-ABT-NPs at 10 mg ABT-737/kg twice per week for four weeks.

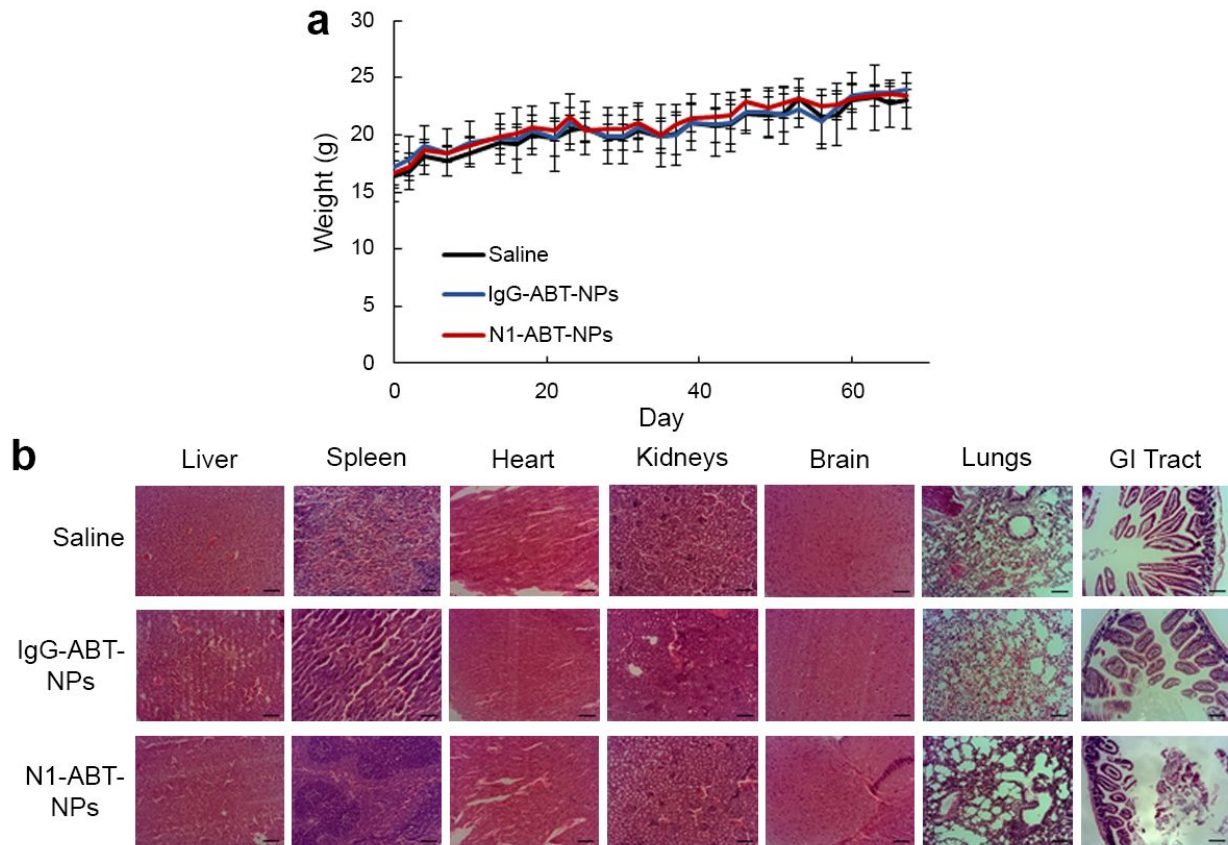

**Figure S4:** Mouse weight and major organ histopathology following treatment with N1-DiD-NPs. (a) Average weight of mice bearing subcutaneous MDA-MB-231 tumors that were treated with saline, IgG-ABT-NPs, or N1-ABT-NPs twice weekly for 8 total injections (n=8 mice/group). (b) H&E staining of representative major organs excised from tumor-bearing mice treated with saline, IgG-ABT-NPs, or N1-ABT-NP twice weekly for four weeks as described in part (a). Scale bars = 100  $\mu$ m.

**Table S1:** Primer sequences used for qRT-PCR

| <b>Gene</b> | <b>Forward Sequence</b> | <b>Reverse Sequence</b> |
|-------------|-------------------------|-------------------------|
| RPLPO       | AACCCAGCTCTGGAGAAACT    | CCCCTGGAGATTTTAGTGGT    |
| Bcl-2       | GACTTCTCCCGCCGCTACC     | CCCAGTTCACCCCGTCCCT     |
| Noxa        | GCTGGAAGTCGAGTGTGCTA    | CCTGAGCAGAAGAGTTTGGA    |
| Hes5        | CCGGTGGTGGAGAAGATGCG    | GCGACGAAGGCTTTGCTGTG    |
| HeyL        | AGCCAGGAAGAAACGCAGAGG   | GCTGTTGAGGTGGGAGAGAAGG  |
